# Supplementary material for: The Relationship Between Occupational Standing and Sitting and Incident Heart Disease Over a 12-Year Period in Ontario, Canada
Source: Oxford University Press journal article supplement (doi:10.1093/aje/kwx298), 2017-08-04
Supplement: kwx298smithwebmaterialfinal.pdf [file kwx298smithwebmaterialfinal.pdf]

## Web Material

**Web Table 1.** Common occupational titles worked by men and women within each body position category

| <b>Sitting</b>                                              |                                        | <b>Standing</b>                        |                                                       | <b>Sitting, Standing, Walking</b>                |                                                    | <b>Other body positions</b>                                                      |                                                       |
|-------------------------------------------------------------|----------------------------------------|----------------------------------------|-------------------------------------------------------|--------------------------------------------------|----------------------------------------------------|----------------------------------------------------------------------------------|-------------------------------------------------------|
| <b>Men</b>                                                  | <b>Women</b>                           | <b>Men</b>                             | <b>Women</b>                                          | <b>Men</b>                                       | <b>Women</b>                                       | <b>Men</b>                                                                       | <b>Women</b>                                          |
| Truck Drivers                                               | Administrative Officers                | Retail Salespersons and Sales Clerks   | Retail Salespersons and Sales Clerks                  | Motor Vehicle Assemblers, Inspectors and Testers | Registered Nurses                                  | Automotive Service Technicians, Truck and Bus Mechanics and Mechanical Repairers | Nurse Aides, Orderlies and Patient Service Associates |
| Administrative Officers                                     | Secretaries (Except Legal and Medical) | Cooks                                  | Cooks                                                 | Delivery and Courier Service Drivers             | Elementary School and Kindergarten Teachers        | Shippers and Receivers                                                           | Light Duty Cleaners                                   |
| Financial Auditors and Accountants                          | Administrative Clerks                  | Other Metal Products Machine Operators | Food and Beverage Servers                             | Retail Trade Managers                            | Cashiers                                           | Janitors, Caretakers and Building Superintendents                                | Janitors, Caretakers and Building Superintendents     |
| Professional Occupations in Business Services to Management | Accounting and Related Clerks          | Machining Tool Operators               | Customer Service Representatives - Financial Services | Sales Representatives - Wholesale Trade          | Elementary and Secondary School Teacher Assistants | Material Handlers                                                                | Shippers and Receivers                                |
|                                                             |                                        | Plastics Processing Machine Operators  | Other Metal Products Machine Operators                |                                                  |                                                    |                                                                                  |                                                       |

**Web Table 2.** Incidence of Heart Disease Over a 12-Year Period across all study variables in a Cohort of Employed Canadian Workers Aged 35 to 74 Years of Age (N = 7,320)

|                                    | All (N = 7,320) |                         |             | Test for difference |         |
|------------------------------------|-----------------|-------------------------|-------------|---------------------|---------|
|                                    | N               | Heart disease incidence | 95% CI      | Wald chi-square     | P-value |
| <b>Age Group</b>                   |                 |                         |             |                     |         |
| 35 to 44 years                     | 3,505           | 1.80                    | 1.17, 2.43  | ref                 |         |
| 45 to 54 years                     | 2,641           | 3.95                    | 2.73, 5.17  | 9.50                | 0.002   |
| 55+ years                          | 1,174           | 6.97                    | 5.02, 8.93  | 24.43               | < 0.001 |
| <b>Weeks Worked</b>                |                 |                         |             |                     |         |
| 1 to 26 weeks                      | 228             | 8.86                    | 0.42, 17.30 | 1.63                | 0.20    |
| 27 to 49 weeks                     | 706             | 2.13                    | 1.25, 3.01  | 4.88                | 0.03    |
| 50+ weeks                          | 6,385           | 3.35                    | 2.72, 3.99  | ref                 |         |
| <b>Usual Work Hours</b>            |                 |                         |             |                     |         |
| 15 to 34 hours                     | 1,004           | 3.33                    | 1.75, 4.92  | 0.01                | 0.94    |
| 35 to 40 hours                     | 3,253           | 3.26                    | 2.22, 4.30  | ref                 |         |
| 41 to 49 hours                     | 1,275           | 2.86                    | 1.77, 3.95  | 0.27                | 0.60    |
| 50+ hours                          | 1,787           | 4.10                    | 2.60, 5.61  | 0.81                | 0.37    |
| <b>Highest Education Completed</b> |                 |                         |             |                     |         |
| Less than secondary                | 736             | 6.20                    | 3.93, 8.47  | ref                 |         |
| Secondary Schooling                | 2,040           | 3.43                    | 2.22, 4.63  | 4.48                | 0.03    |
| Post-secondary (below Bachelors)   | 2,795           | 3.24                    | 2.10, 4.39  | 5.22                | 0.02    |
| Bachelors and higher               | 1,749           | 2.46                    | 1.33, 3.59  | 8.39                | 0.004   |
| <b>Canadian Born</b>               |                 |                         |             |                     |         |
| Yes                                | 5,138           | 3.25                    | 2.59, 3.90  | ref                 |         |
| No                                 | 2,182           | 3.78                    | 2.31, 5.24  | 0.42                | 0.52    |
| <b>Ethnicity</b>                   |                 |                         |             |                     |         |
| White                              | 6,285           | 3.44                    | 2.78, 4.09  | ref                 |         |
| Non-White                          | 1,035           | 3.22                    | 0.87, 5.57  | 0.03                | 0.86    |
| <b>Geographic Location</b>         |                 |                         |             |                     |         |
| Urban                              | 6,190           | 3.46                    | 2.72, 4.20  | ref                 |         |
| Rural                              | 1,130           | 3.10                    | 2.07, 4.13  | 0.31                | 0.58    |
| <b>Marital Status</b>              |                 |                         |             |                     |         |
| Married/Common-Law                 | 5,882           | 3.18                    | 2.51, 3.85  | ref                 |         |
| Divorced/Separated/Widowed         | 843             | 4.35                    | 1.96, 6.75  | 0.85                | 0.36    |
| Single                             | 595             | 4.30                    | 2.26, 6.33  | 1.05                | 0.30    |

**Web Table 2 (cont).** Incidence of Heart Disease Over a 12-Year Period across all study variables in a Cohort of Employed Canadian Workers Aged 35 to 74 Years of Age (N = 7,320)

|                                                                           | All (N = 7,320) |                         |             | Test for difference |         |
|---------------------------------------------------------------------------|-----------------|-------------------------|-------------|---------------------|---------|
|                                                                           | N               | Heart disease incidence | 95% CI      | Wald chi-square     | P-value |
| <b>Children Less than 12 in household</b>                                 |                 |                         |             |                     |         |
| Yes                                                                       | 2,395           | 2.38                    | 1.29, 3.46  | ref                 |         |
| No                                                                        | 4,925           | 3.91                    | 3.10, 4.71  | 4.93                | 0.03    |
| <b>Often has restrictions in activity at work due to health condition</b> |                 |                         |             |                     |         |
| Yes                                                                       | 277             | 7.65                    | 2.52, 12.79 | 2.81                | 0.09    |
| No                                                                        | 7,043           | 3.24                    | 2.60, 3.88  | ref                 |         |
| <b>Hypertension</b>                                                       |                 |                         |             |                     |         |
| Yes                                                                       | 929             | 4.11                    | 2.51, 5.72  | 0.84                | 0.36    |
| No                                                                        | 6,391           | 3.30                    | 2.62, 3.99  | ref                 |         |
| <b>Diabetes</b>                                                           |                 |                         |             |                     |         |
| Yes                                                                       | 263             | 10.36                   | 4.75, 15.98 | 6.29                | 0.01    |
| No                                                                        | 7,057           | 3.15                    | 2.52, 3.77  | ref                 |         |
| <b>Arthritis</b>                                                          |                 |                         |             |                     |         |
| Yes                                                                       | 1,082           | 4.21                    | 2.53, 5.89  | 1.03                | 0.31    |
| No                                                                        | 6,238           | 3.27                    | 2.56, 3.97  | ref                 |         |
| <b>Mood and Anxiety</b>                                                   |                 |                         |             |                     |         |
| Yes                                                                       | 522             | 1.48                    | 0.57, 2.39  | 12.60               | < 0.001 |
| No                                                                        | 6,798           | 3.55                    | 2.86, 4.24  | ref                 |         |
| <b>Other Chronic Conditions</b>                                           |                 |                         |             |                     |         |
| Yes                                                                       | 3,533           | 3.72                    | 2.67, 4.76  | 0.87                | 0.35    |
| No                                                                        | 3,787           | 3.11                    | 2.37, 3.86  | ref                 |         |
| <b>Current shift schedule</b>                                             |                 |                         |             |                     |         |
| Regular                                                                   | 5,583           | 3.15                    | 2.39, 3.90  |                     |         |
| Evening or night                                                          | 455             | 2.71                    | 1.10, 4.31  | 0.24                | 0.63    |
| Rotating                                                                  | 777             | 4.68                    | 2.50, 6.87  | 1.69                | 0.19    |
| Other shift schedules                                                     | 505             | 4.94                    | 2.91, 6.98  | 2.63                | 0.11    |
| <b>Handling of loads</b>                                                  |                 |                         |             |                     |         |
| Limited and Light                                                         | 5,637           | 3.17                    | 2.44, 3.90  |                     |         |
| Medium and Heavy                                                          | 1,683           | 4.21                    | 3.00, 5.41  | 2.06                | 0.15    |

**Web Table 2 (cont).** Incidence of Heart Disease Over a 12-Year Period across all study variables in a Cohort of Employed Canadian Workers Aged 35 to 74 Years of Age (N = 7,320)

|                                       | All (N = 7,320) |                         |            | Test for difference |         |
|---------------------------------------|-----------------|-------------------------|------------|---------------------|---------|
|                                       | N               | Heart disease incidence | 95% CI     | Wald chi-square     | P-value |
| <b>Smoking</b>                        |                 |                         |            |                     |         |
| Never smoker                          | 2,246           | 2.67                    | 1.24, 4.11 | ref                 |         |
| Former smoker                         | 3,156           | 2.52                    | 1.90, 3.14 | 0.04                | 0.85    |
| Occasional smoker                     | 356             | 5.45                    | 2.40, 8.50 | 2.63                | 0.11    |
| Daily smoker                          | 1,562           | 5.78                    | 3.97, 7.60 | 6.97                | 0.01    |
| <b>Leisure time physical activity</b> |                 |                         |            |                     |         |
| Active                                | 1,603           | 4.10                    | 2.60, 5.61 | ref                 |         |
| Moderately Active                     | 1,917           | 2.46                    | 1.20, 3.71 | 2.71                | 0.10    |
| Inactive                              | 3,799           | 3.59                    | 2.78, 4.40 | 0.35                | 0.56    |
| <b>Alcohol Consumption</b>            |                 |                         |            |                     |         |
| Non-Drinker                           | 1,042           | 4.73                    | 2.79, 6.67 | 3.14                | 0.08    |
| Non-Binge Drinker                     | 3,448           | 2.81                    | 1.93, 3.69 | ref                 |         |
| Binge drinker (last 12 months)        | 2,829           | 3.64                    | 2.61, 4.68 | 1.45                | 0.23    |
| <b>Body Mass Index</b>                |                 |                         |            |                     |         |
| Normal weight (includes underweight)  | 3,337           | 2.65                    | 1.84, 3.47 | ref                 |         |
| Overweight                            | 2,751           | 2.74                    | 2.01, 3.47 | 0.03                | 0.87    |
| Obese                                 | 1,232           | 6.93                    | 4.46, 9.40 | 10.44               | 0.001   |

CI – confidence interval

All estimates are weighted for the probability of selection into the CCHS and initial survey non-response. Confidence limits have been adjusted to take into account the clustered design of the CCHS. Although age-group, weeks worked and work hours are included in the table as categorical variables they were included in regression models as continuous measures
